# Supplementary material for: Dynamics of Anti-S IgG Antibodies Titers after the Second Dose of COVID-19 Vaccines in the Manual and Craft Worker Population of Qatar
Source: MDPI journal article supplement (doi:10.3390/vaccines11030496), 2023-02-21
Supplement: s1 [file s1]

## Annexure 1

**Table S1.** Characteristics of participants who had anti-S IgG antibodies, by anti-NC IgG status.

| Variables                                                                     | Anti-NC IgG absent       | Anti-NC IgG present       |
|-------------------------------------------------------------------------------|--------------------------|---------------------------|
| N                                                                             | 265                      | 29                        |
| Age (years), median (IQR)                                                     | 37.1 (31.6, 44.9)        | 35.0 (26.7, 39.8)         |
| <b>Nationality</b>                                                            |                          |                           |
| Indian                                                                        | 29.1%                    | 24.1%                     |
| Nepali                                                                        | 35.8%                    | 44.8%                     |
| Others                                                                        | 34.7%                    | 31.0%                     |
| Missing                                                                       | 0.4%                     | 0.0%                      |
| <b>Religion</b>                                                               |                          |                           |
| Hindu                                                                         | 10.2%                    | 3.4%                      |
| Muslim                                                                        | 59.6%                    | 62.1%                     |
| Others                                                                        | 27.5%                    | 27.6%                     |
| Missing                                                                       | 2.6%                     | 6.9%                      |
| <b>Occupation</b>                                                             |                          |                           |
| Construction                                                                  | 37.0%                    | 20.7%                     |
| Others                                                                        | 63.0%                    | 79.3%                     |
| <b>Travel history (past 2 weeks)</b>                                          |                          |                           |
| No                                                                            | 95%                      | 96.5%                     |
| Yes                                                                           | 1.5%                     | 3.5%                      |
| Missing                                                                       | 3.5%                     | 0%                        |
| Number of handwashes (past 24 hours) median (IQR)                             | 10.0 (4.0,18.0)          | 10.0 (7.0,16.0)           |
| <b>Vaccine group</b>                                                          |                          |                           |
| Not mRNA                                                                      | 10.6%                    | 37.9%                     |
| Moderna                                                                       | 48.3%                    | 34.5%                     |
| Pfizer                                                                        | 40.4%                    | 27.6%                     |
| None                                                                          | 0.8%                     | 0.0%                      |
| Interval between two doses (days), median (IQR)                               | 28.0 (21.0, 28.0)        | 28.0 (22.0, 30.0)         |
| Duration between sample collection and last vaccine dose (days), median (IQR) | 130.0 (72.0, 173.0)      | 117.0 (88.0, 147.0)       |
| <b>IgG spike status</b>                                                       |                          |                           |
| Absent                                                                        | 1.1%                     | 0.0%                      |
| Present                                                                       | 94.7%                    | 100.0%                    |
| Test not done (Sample Rejected)                                               | 4.2%                     | 0.0%                      |
| Anti-S IgG antibody titre (AU/mL), median (IQR)                               | 8879.3 (3923.0, 19846.5) | 10698.8 (3377.5, 21324.1) |

**Table S2.** Hazard rate and survival time for Non-mRNA, Moderna and Pfizer vaccines.

| Vaccine type | Time at risk (months) | Incidence rate | Number of subjects | Time (in months) at which 25%, 50%, and 75% of subjects dropped into the lowest Anti-S IgG quartile |             |             |
|--------------|-----------------------|----------------|--------------------|-----------------------------------------------------------------------------------------------------|-------------|-------------|
|              |                       |                |                    | 25%                                                                                                 | 50%         | 75%         |
| Non-mRNA     | 101.13                | 0.198          | 37                 | 2.2                                                                                                 | 3.53        | 4.5         |
| Moderna      | 566.27                | 0.035          | 139                | 6.37                                                                                                | not reached | not reached |
| Pfizer       | 577.47                | 0.050          | 118                | 6.33                                                                                                | 7.63        | 8.47        |

**Table S3.** Cox proportional hazard regression model results.

| Variables          | Hazard ratio | p-value | 95% Confidence Interval |
|--------------------|--------------|---------|-------------------------|
| Moderna            | 0.090        | 0.000   | 0.042-0.190             |
| Pfizer             | 0.121        | 0.000   | 0.059- 0.249            |
| Age (centered)     | 0.994        | 0.965   | 0.965-1.024             |
| IgGNC status       | 0.367        | 0.025   | 0.152-0.881             |
| Number of subjects | 281          |         |                         |
| Number of failures | 67           |         |                         |
| Total time at risk | 1203.1       |         |                         |
| LR chi2(4)         | 41.33        | 0.000   |                         |

**Annexure 2: Protocols for COVID-19 Among Labour in Qatar**

**Environmental sampling of COVID-19**

| <b>1. Sample location information (complete new table for each sampling collection):</b> |                                                                                                                                                                               |
|------------------------------------------------------------------------------------------|-------------------------------------------------------------------------------------------------------------------------------------------------------------------------------|
| Identification number                                                                    |                                                                                                                                                                               |
| Date sample collected (DD/MM/YYYY)                                                       | (DD/MM/YYYY)___/___/___<br>Time:                                                                                                                                              |
| Room temperature at time of sampling (°C)                                                |                                                                                                                                                                               |
| Room humidity at time of sampling (%)                                                    |                                                                                                                                                                               |
| Location of room in which sample was collected                                           | <input type="checkbox"/> Participant's bedroom<br><input type="checkbox"/> Participant's bathroom<br><input type="checkbox"/> Entry routing<br><input type="checkbox"/> Other |
| When was the room last cleaned?                                                          | (DD/MM/YYYY)___/___/___<br>Time:                                                                                                                                              |
| When was the room last disinfected?                                                      | (DD/MM/YYYY)___/___/___<br>Time:                                                                                                                                              |

| <b>2. Sampling information :</b>   |                                                                                                                                                            |
|------------------------------------|------------------------------------------------------------------------------------------------------------------------------------------------------------|
| If yes, were multiple swabs taken? | <input type="checkbox"/> Yes <input type="checkbox"/> No <input type="checkbox"/> Unknown                                                                  |
| What storage medium was used?      | <input type="checkbox"/> Viral transport medium<br><input type="checkbox"/> Tryzol<br><input type="checkbox"/> RNAlater<br><input type="checkbox"/> Other: |

| <b>3. Storage and transport information :</b>   |                                  |
|-------------------------------------------------|----------------------------------|
| When were the samples stored at the laboratory? | (DD/MM/YYYY)___/___/___<br>Time: |

|                                                      |                                                                                                                                     |
|------------------------------------------------------|-------------------------------------------------------------------------------------------------------------------------------------|
| How were the samples stored at the laboratory?       | <input type="checkbox"/> 4°C<br><input type="checkbox"/> -20°C<br><input type="checkbox"/> -80°C<br><input type="checkbox"/> Other: |
| When were the samples transported to the laboratory? | (DD/MM/YYYY)___/___/_____<br><br>Time:                                                                                              |
| How were the samples transported to the laboratory?  | <input type="checkbox"/> 4°C<br><input type="checkbox"/> -20°C<br><input type="checkbox"/> -80°C<br><input type="checkbox"/> Other: |

## Epidemiological and clinical information

|                                                                                                             |                                                                                                                                 |
|-------------------------------------------------------------------------------------------------------------|---------------------------------------------------------------------------------------------------------------------------------|
| <b>Patient identification number</b>                                                                        |                                                                                                                                 |
| <b>1. Current Status</b>                                                                                    | <input type="checkbox"/> Alive <input type="checkbox"/> Dead                                                                    |
| <b>2. Data Collector Information</b>                                                                        |                                                                                                                                 |
| <b>Name of data collector</b>                                                                               |                                                                                                                                 |
| Data collector Institution                                                                                  |                                                                                                                                 |
| Data collector telephone number                                                                             |                                                                                                                                 |
| Mobile number                                                                                               |                                                                                                                                 |
| Email                                                                                                       |                                                                                                                                 |
| Form completion date (DD/MM/YYYY)      ____/____/____                                                       |                                                                                                                                 |
| Date of interview with informant (DD/MM/YYYY)      ____/____/____                                           |                                                                                                                                 |
| <b>3. COVID-19 patient information</b>                                                                      |                                                                                                                                 |
| <b>First name</b>                                                                                           |                                                                                                                                 |
| <b>Surname</b>                                                                                              |                                                                                                                                 |
| Sex <input type="checkbox"/> Male <input type="checkbox"/> Female <input type="checkbox"/> Not known        |                                                                                                                                 |
| Date of birth (DD/MM/YYYY)      ____/____/____                                                              |                                                                                                                                 |
| Telephone (mobile) number                                                                                   |                                                                                                                                 |
| Country of residence                                                                                        |                                                                                                                                 |
| Nationality                                                                                                 |                                                                                                                                 |
| Ethnicity (optional)                                                                                        |                                                                                                                                 |
| Responsible Health Centre                                                                                   |                                                                                                                                 |
| Nursery/School/College if appropriate Work/<br>Stay home etc                                                |                                                                                                                                 |
| <input type="checkbox"/> Yes <input type="checkbox"/> No <input type="checkbox"/> Unknown                   |                                                                                                                                 |
| Have you travelled within the last 14 days domestically?                                                    | If Yes, dates of travel (DD/MM/YYYY):<br>____/____/____ to ____/____/____                                                       |
|                                                                                                             | Regions: Cities visited:<br><input type="checkbox"/> Yes <input type="checkbox"/> No <input type="checkbox"/> Unknown           |
| Have you travelled within the last 14 days internationally?                                                 | If Yes, dates of travel (DD/MM/YYYY):<br>____/____/____ to ____/____/____                                                       |
|                                                                                                             | Countries visited: Cities visited:<br><input type="checkbox"/> Yes <input type="checkbox"/> No <input type="checkbox"/> Unknown |
| In the past 14 days, have you had contact with a<br>anyone with suspect or confirmed COVID-19<br>infection? | If Yes, dates of last contact (DD/MM/YYYY):<br>____/____/____                                                                   |

| 4a. Primary case symptoms from onset of illness                                |                                                                                                                                                         |
|--------------------------------------------------------------------------------|---------------------------------------------------------------------------------------------------------------------------------------------------------|
| Date of first symptom onset*<br>(DD/MM/YYYY)                                   | ___/___/___<br><input type="checkbox"/> Asymptomatic <input type="checkbox"/> Unknown                                                                   |
| Fever ( $\geq 38^{\circ}\text{C}$ ) or history of fever*                       | <input type="checkbox"/> Yes <input type="checkbox"/> No <input type="checkbox"/> Unknown<br>If yes, specify maximum temperature from onset of illness: |
| Date of first health facility visit (including traditional care)* (DD/MM/YYYY) | ___/___/___<br><input type="checkbox"/> NA <input type="checkbox"/> Unknown                                                                             |
| Total number of visits to health facilities since onset of illness             |                                                                                                                                                         |
| Total number of health facilities visited since onset of illness               | <input type="checkbox"/> NA <input type="checkbox"/> Unknown<br>Specify:                                                                                |
| 4b. Respiratory symptoms                                                       |                                                                                                                                                         |
| Sore throat*                                                                   | <input type="checkbox"/> Yes <input type="checkbox"/> No <input type="checkbox"/> Unknown<br>If Yes, date (DD/MM/YYYY): _ / _ / _                       |
| Cough*                                                                         | <input type="checkbox"/> Yes <input type="checkbox"/> No <input type="checkbox"/> Unknown<br>If Yes, date (DD/MM/YYYY): _ / _ / _                       |
| Runny nose*                                                                    | <input type="checkbox"/> Yes <input type="checkbox"/> No <input type="checkbox"/> Unknown                                                               |
| Shortness of breath*                                                           | <input type="checkbox"/> Yes <input type="checkbox"/> No <input type="checkbox"/> Unknown<br>If Yes, date (DD/MM/YYYY): _ / _ / _                       |
| 4c. Other symptoms                                                             |                                                                                                                                                         |
| Chills                                                                         | <input type="checkbox"/> Yes <input type="checkbox"/> No <input type="checkbox"/> Unknown                                                               |
| Vomiting                                                                       | <input type="checkbox"/> Yes <input type="checkbox"/> No <input type="checkbox"/> Unknown                                                               |
| Nausea                                                                         | <input type="checkbox"/> Yes <input type="checkbox"/> No <input type="checkbox"/> Unknown                                                               |
| Diarrhoea                                                                      | <input type="checkbox"/> Yes <input type="checkbox"/> No <input type="checkbox"/> Unknown                                                               |
| Headache                                                                       | <input type="checkbox"/> Yes <input type="checkbox"/> No <input type="checkbox"/> Unknown                                                               |
| Neurological signs If Yes, specify                                             | <input type="checkbox"/> Yes <input type="checkbox"/> No <input type="checkbox"/> Unknown                                                               |
| Rash                                                                           | <input type="checkbox"/> Yes <input type="checkbox"/> No <input type="checkbox"/> Unknown                                                               |
| Conjunctivitis                                                                 | <input type="checkbox"/> Yes <input type="checkbox"/> No <input type="checkbox"/> Unknown                                                               |
| Muscle ache                                                                    | <input type="checkbox"/> Yes <input type="checkbox"/> No <input type="checkbox"/> Unknown                                                               |
| Joint ache                                                                     | <input type="checkbox"/> Yes <input type="checkbox"/> No <input type="checkbox"/> Unknown                                                               |
| Loss of appetite                                                               | <input type="checkbox"/> Yes <input type="checkbox"/> No <input type="checkbox"/> Unknown                                                               |
| Nose bleed                                                                     | <input type="checkbox"/> Yes <input type="checkbox"/> No <input type="checkbox"/> Unknown                                                               |
| Fatigue                                                                        | <input type="checkbox"/> Yes <input type="checkbox"/> No <input type="checkbox"/> Unknown                                                               |
| General malaise                                                                | <input type="checkbox"/> Yes <input type="checkbox"/> No <input type="checkbox"/> Unknown                                                               |
| Seizures                                                                       | <input type="checkbox"/> Yes <input type="checkbox"/> No <input type="checkbox"/> Unknown                                                               |
| Altered consciousness                                                          | <input type="checkbox"/> Yes <input type="checkbox"/> No <input type="checkbox"/> Unknown                                                               |
| Other symptoms                                                                 | <input type="checkbox"/> Yes <input type="checkbox"/> No <input type="checkbox"/> Unknown If yes, specify:                                              |

| 5. Primary case pre-existing condition(s) |                                                                                                                                                                                                                                                                                                                                                                                                                                                                                   |
|-------------------------------------------|-----------------------------------------------------------------------------------------------------------------------------------------------------------------------------------------------------------------------------------------------------------------------------------------------------------------------------------------------------------------------------------------------------------------------------------------------------------------------------------|
| Obesity                                   | <input type="checkbox"/> Yes <input type="checkbox"/> No <input type="checkbox"/> Unknown                                                                                                                                                                                                                                                                                                                                                                                         |
| Cancer                                    | <input type="checkbox"/> Yes <input type="checkbox"/> No <input type="checkbox"/> Unknown                                                                                                                                                                                                                                                                                                                                                                                         |
| Diabetes                                  | <input type="checkbox"/> Yes <input type="checkbox"/> No <input type="checkbox"/> Unknown                                                                                                                                                                                                                                                                                                                                                                                         |
| HIV/other immune deficiency               | <input type="checkbox"/> Yes <input type="checkbox"/> No <input type="checkbox"/> Unknown                                                                                                                                                                                                                                                                                                                                                                                         |
| Heart disease                             | <input type="checkbox"/> Yes <input type="checkbox"/> No <input type="checkbox"/> Unknown                                                                                                                                                                                                                                                                                                                                                                                         |
| Asthma (requiring medication)             | <input type="checkbox"/> Yes <input type="checkbox"/> No <input type="checkbox"/> Unknown                                                                                                                                                                                                                                                                                                                                                                                         |
| Chronic lung disease (non-asthma)         | <input type="checkbox"/> Yes <input type="checkbox"/> No <input type="checkbox"/> Unknown                                                                                                                                                                                                                                                                                                                                                                                         |
| Chronic liver disease                     | <input type="checkbox"/> Yes <input type="checkbox"/> No <input type="checkbox"/> Unknown                                                                                                                                                                                                                                                                                                                                                                                         |
| Chronic haematological disorder           | <input type="checkbox"/> Yes <input type="checkbox"/> No <input type="checkbox"/> Unknown                                                                                                                                                                                                                                                                                                                                                                                         |
|                                           | <input type="checkbox"/> Yes <input type="checkbox"/> No <input type="checkbox"/> Unknown If yes, specify trimester:                                                                                                                                                                                                                                                                                                                                                              |
| Pregnancy                                 | <input type="checkbox"/> First <input type="checkbox"/> Second <input type="checkbox"/> Third <input type="checkbox"/> NA Estimated delivery date(DD/MM/YYYY)<br><div style="text-align: center;"> <div style="border-bottom: 1px solid black; width: 20px; display: inline-block;"></div> <div style="border-bottom: 1px solid black; width: 20px; display: inline-block;"></div> <div style="border-bottom: 1px solid black; width: 20px; display: inline-block;"></div> </div> |
| Chronic kidney disease                    | <input type="checkbox"/> Yes <input type="checkbox"/> No <input type="checkbox"/> Unknown                                                                                                                                                                                                                                                                                                                                                                                         |
| Chronic neurological impairment/disease   | <input type="checkbox"/> Yes <input type="checkbox"/> No <input type="checkbox"/> Unknown                                                                                                                                                                                                                                                                                                                                                                                         |
| Organ or bone marrow recipient            | <input type="checkbox"/> Yes <input type="checkbox"/> No <input type="checkbox"/> Unknown                                                                                                                                                                                                                                                                                                                                                                                         |
| Other pre-existing condition(s)           | <input type="checkbox"/> Yes <input type="checkbox"/> No <input type="checkbox"/> Unknown<br>If yes, specify:                                                                                                                                                                                                                                                                                                                                                                     |
